# Supplementary material for: Microencapsulated equine mesenchymal stromal cells promote cutaneous wound healing in vitro
Source: PubMed Central journal article supplement (PMC4413990; doi:10.1186/s13287-015-0037-x), 2015-04-11
Supplement: 13287_2015_37_MOESM2_ESM.pdf [file 13287_2015_37_MOESM2_ESM.pdf]

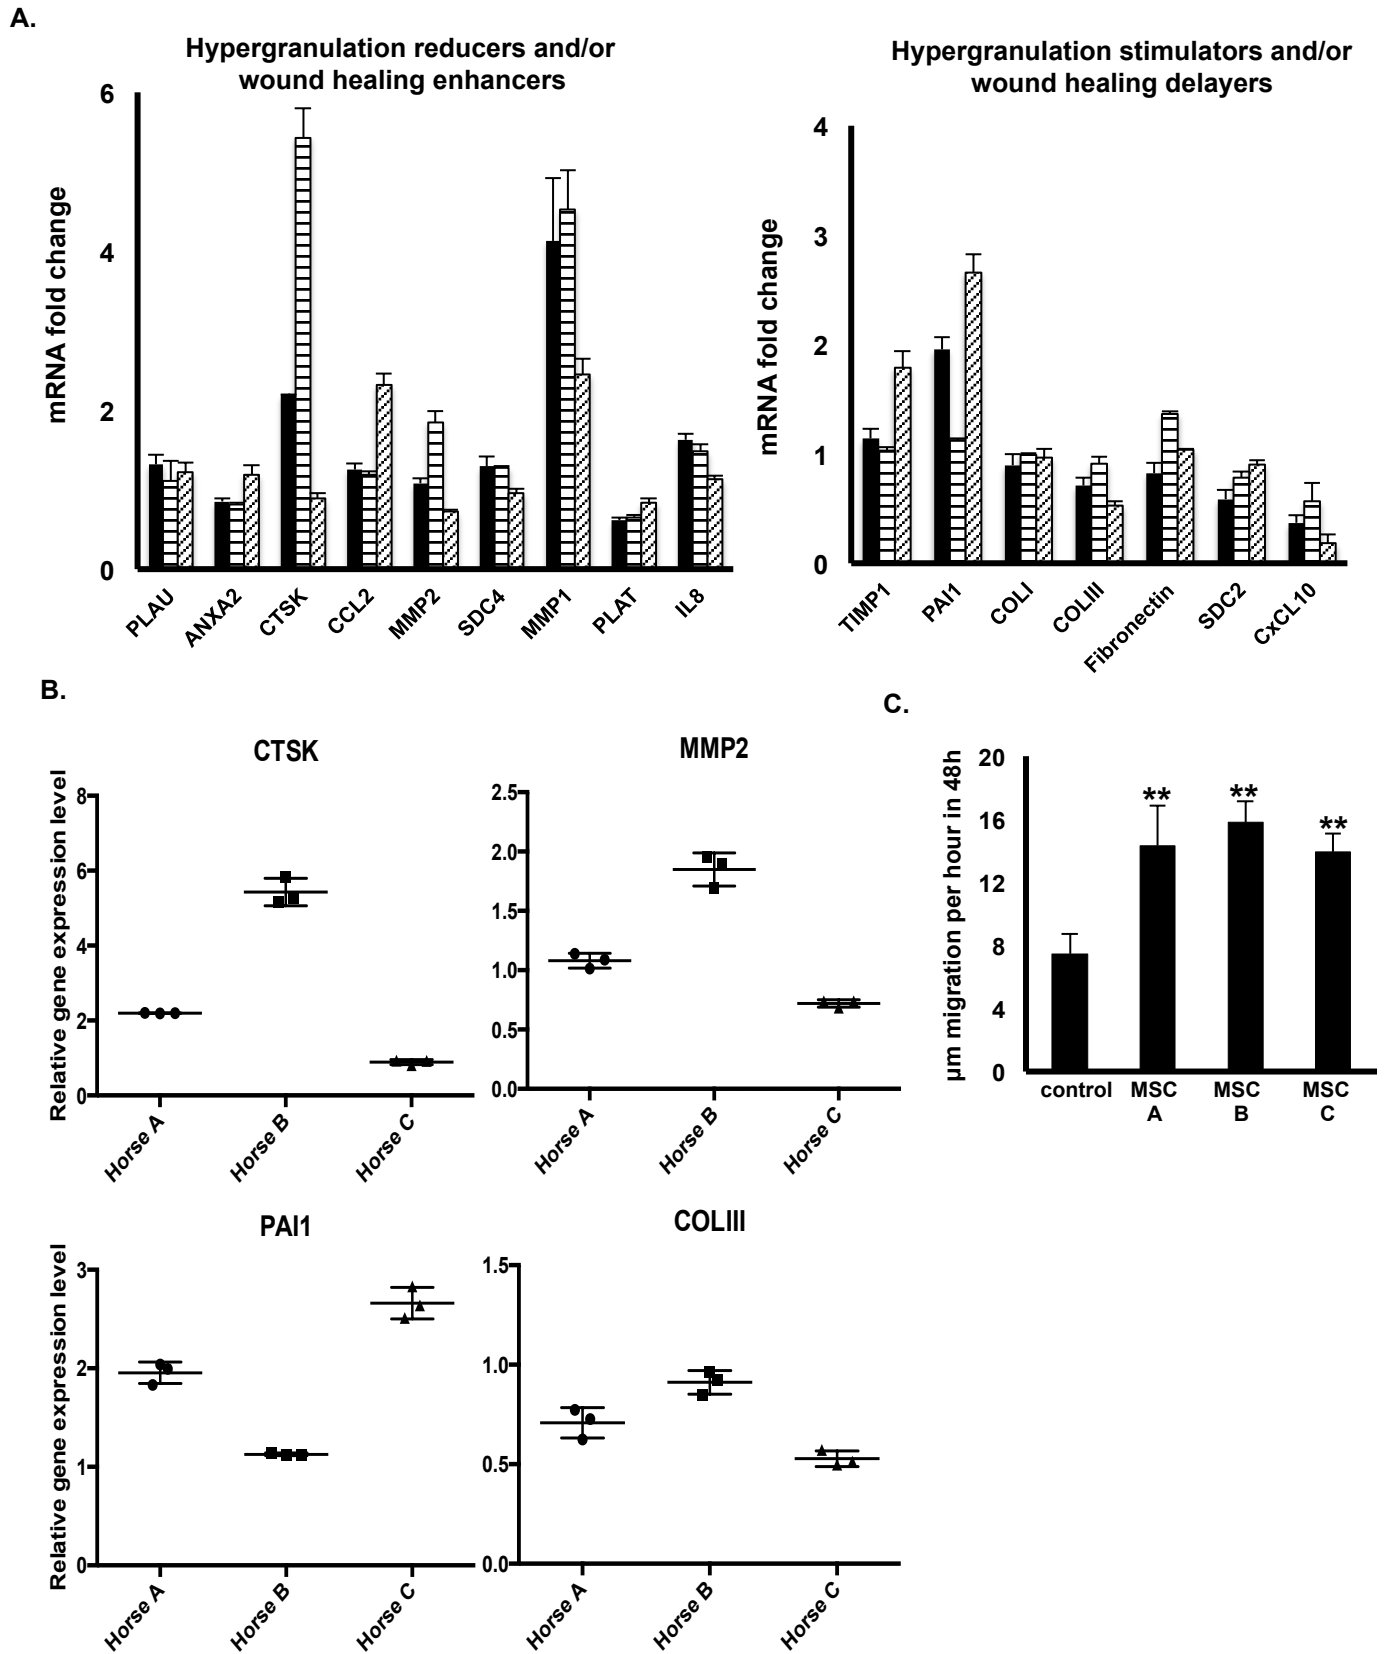

Supplemental Figure 2. Bussche et al.
